# Supplementary material for: Genetic Variability of Antioxidative Mechanisms and Cardiotoxicity after Adjuvant Radiotherapy in HER2-Positive Breast Cancer Patients
Source: Hindawi journal article supplement (doi:10.1155/2020/6645588), 2020-12-19
Supplement: f1 [file 6645588.f1.pdf]

Supplementary Table 1: Genotype frequencies of investigated polymorphisms.

| <b>Gene</b>  | <b>Polymorphism</b> | <b>Role</b> | <b>Genotype</b> | <b>N (%)</b> | <b>MAF</b> | <b>pHWE</b> |
|--------------|---------------------|-------------|-----------------|--------------|------------|-------------|
| <i>PON1</i>  | rs854560            | p.Leu55Met  | AA              | 42 (41.6)    | 0.366      | 0.536       |
|              |                     |             | AT              | 44 (43.6)    |            |             |
|              |                     |             | TT              | 15 (14.9)    |            |             |
| <i>PON1</i>  | rs662               | p.Gln192Arg | AA              | 54 (53.5)    | 0.267      | 0.912       |
|              |                     |             | AG              | 40 (39.6)    |            |             |
|              |                     |             | GG              | 7 (6.9)      |            |             |
| <i>GSTP1</i> | rs1138272           | p.Ala114Val | CC              | 83 (82.2)    | 0.099      | 0.260       |
|              |                     |             | CT              | 16 (15.8)    |            |             |
|              |                     |             | TT              | 2 (2.0)      |            |             |
| <i>GSTP1</i> | rs1695              | p.Ile105Val | AA              | 44 (43.6)    | 0.317      | 0.149       |
|              |                     |             | AG              | 50 (49.5)    |            |             |
|              |                     |             | GG              | 7 (6.9)      |            |             |
| <i>SOD2</i>  | rs4880              | p.Ala16Val  | CC              | 35 (34.7)    | 0.475      | 0.004       |
|              |                     |             | TC              | 36 (35.6)    |            |             |
|              |                     |             | TT              | 30 (29.7)    |            |             |
| <i>CAT</i>   | rs1001179           | c.-330C>T   | CC              | 64 (63.4)    | 0.203      | 0.921       |
|              |                     |             | CT              | 33 (32.7)    |            |             |
|              |                     |             | TT              | 4 (4.0)      |            |             |
| <i>HIF1A</i> | rs1154965           | p.Pro582Ser | CC              | 88 (87.1)    | 0.069      | 0.427       |
|              |                     |             | CT              | 12 (11.9)    |            |             |
|              |                     |             | TT              | 1 (1.0)      |            |             |

HWE, Hardy-Weinberg equilibrium; MAF, minor allele frequency
